# Supplementary material
Source: publisher figshare collection journal article supplement (https://gsajournals.figshare.com/articles/dataset/_/14842779)

**A****Thiabendazole concentration ( $\mu\text{g/ml}$ )**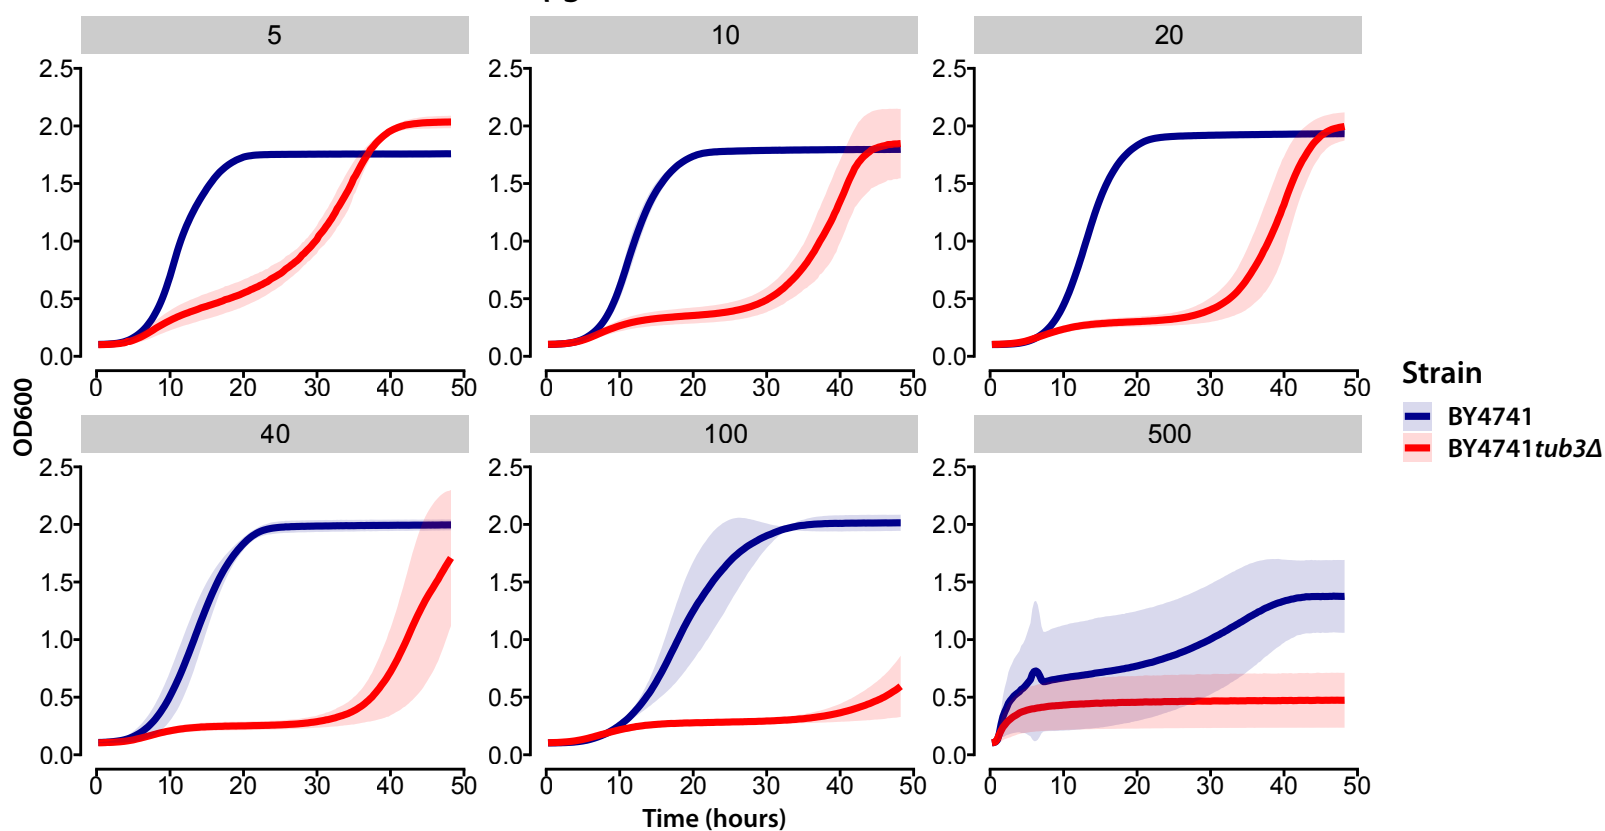**B**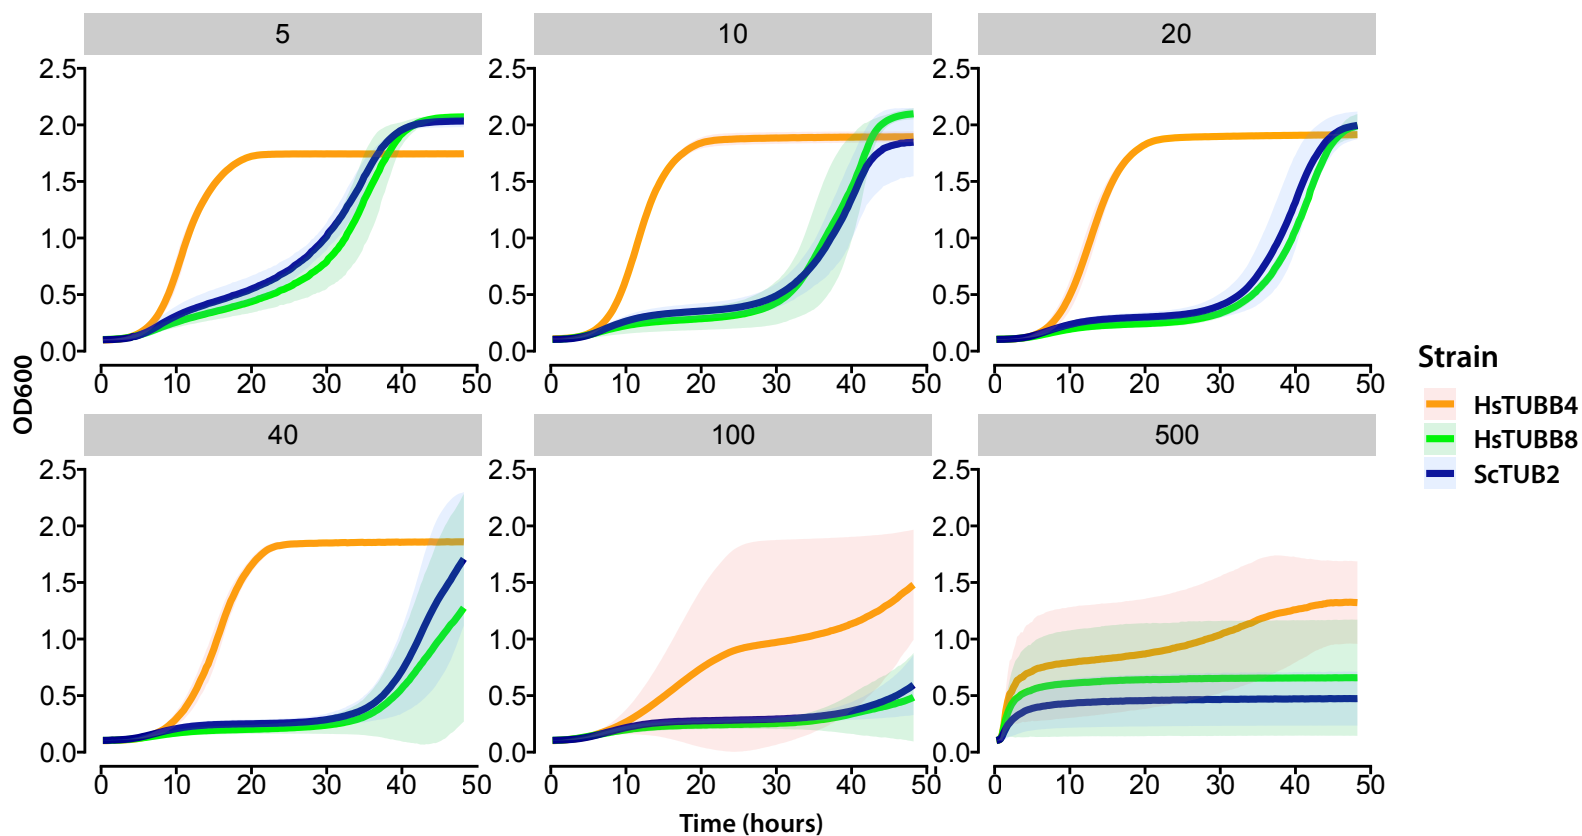**Figure S3**

Supplement: Supplementary file 1 [file 1]

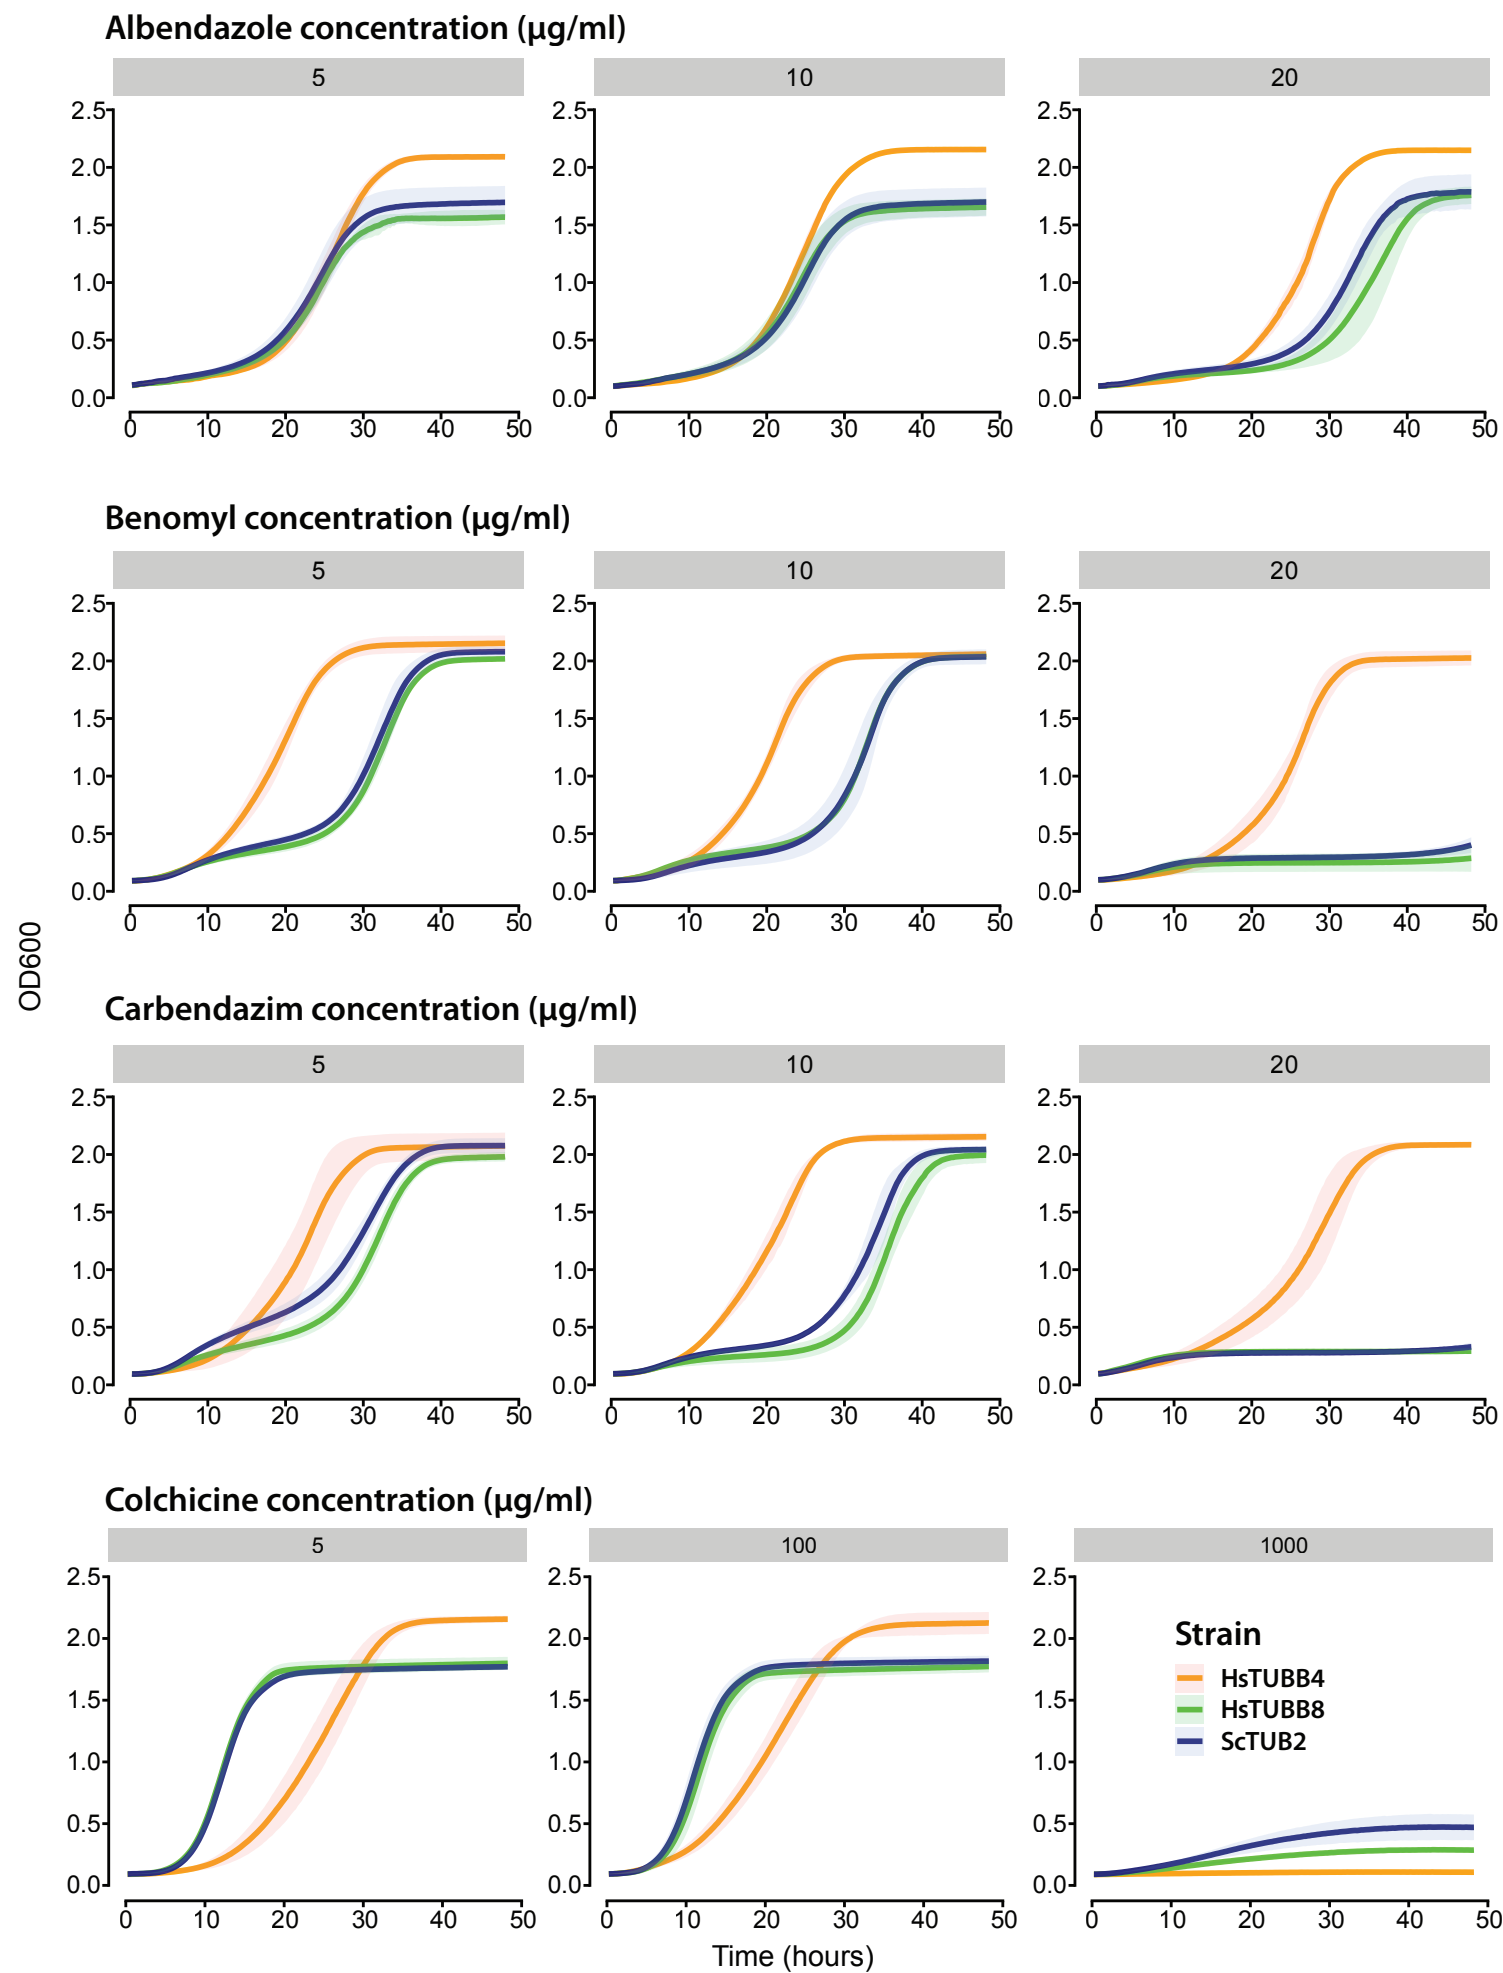

**Figure S5**

Supplement: Supplementary file 2 [file 1]

A

## Wild-type

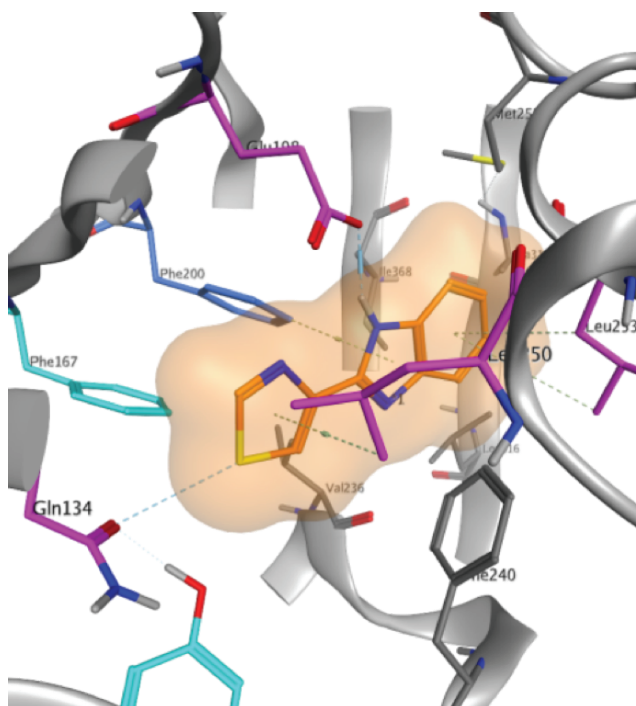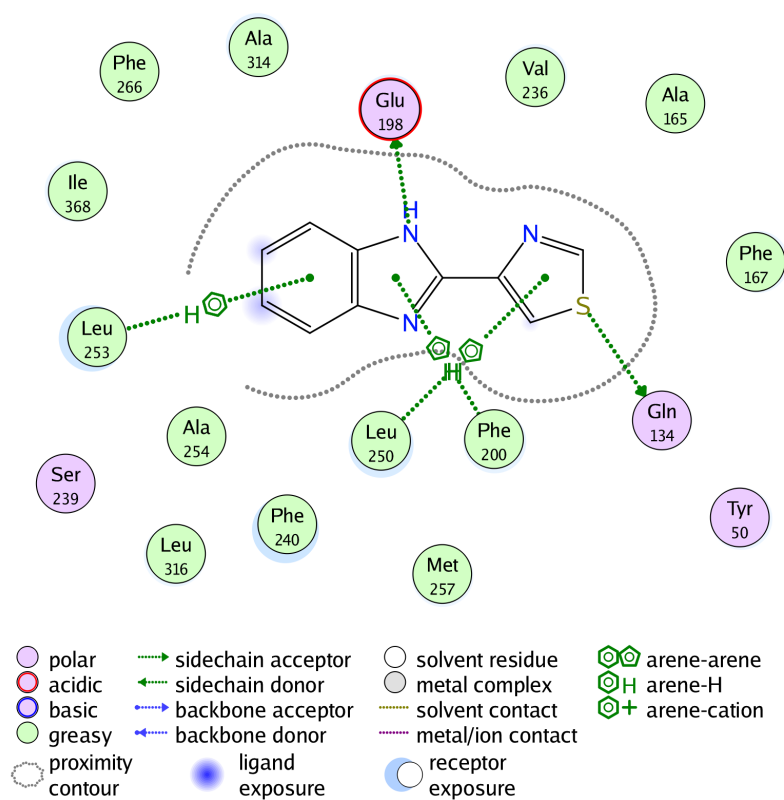

B

## F200Y mutant

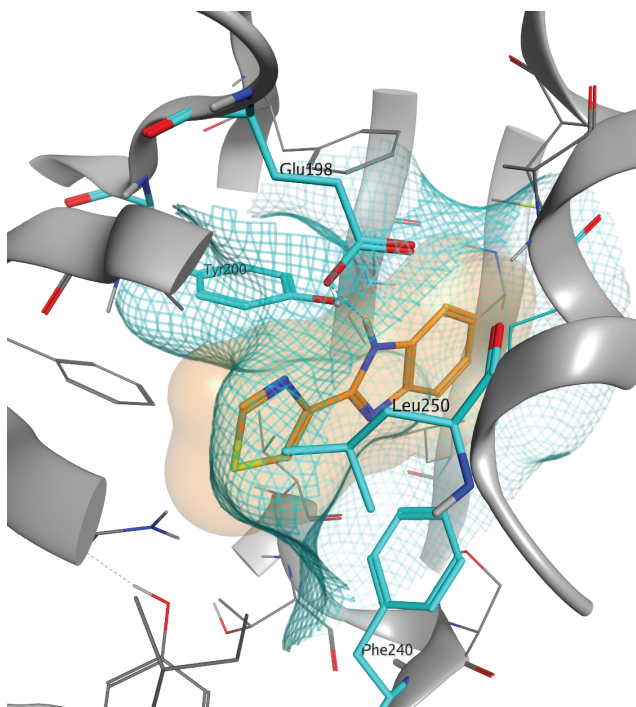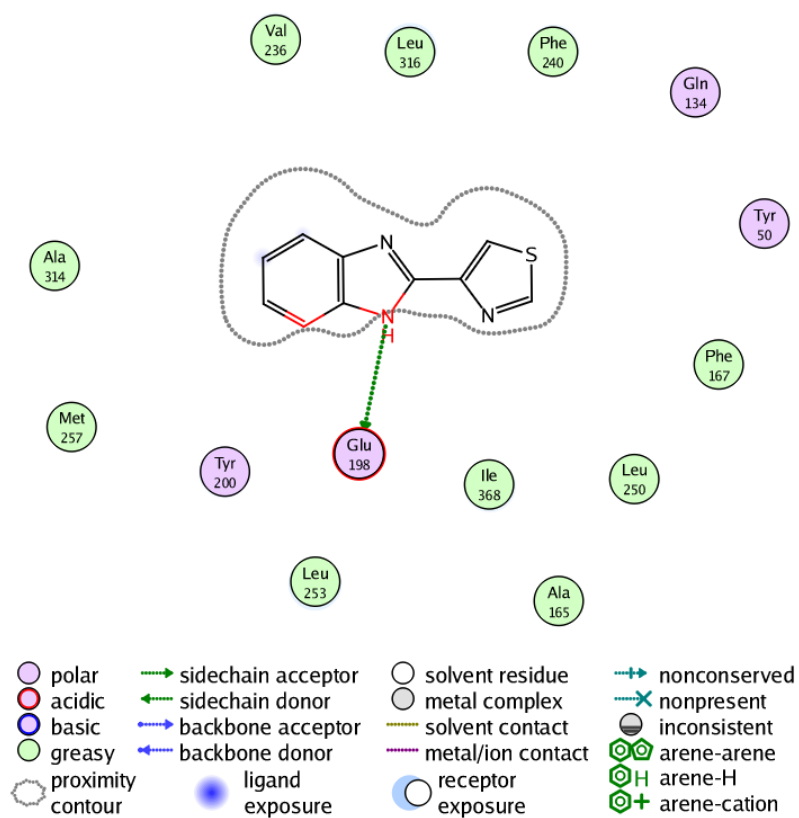

Figure S1

Supplement: Supplementary file 3 [file 1]

**A**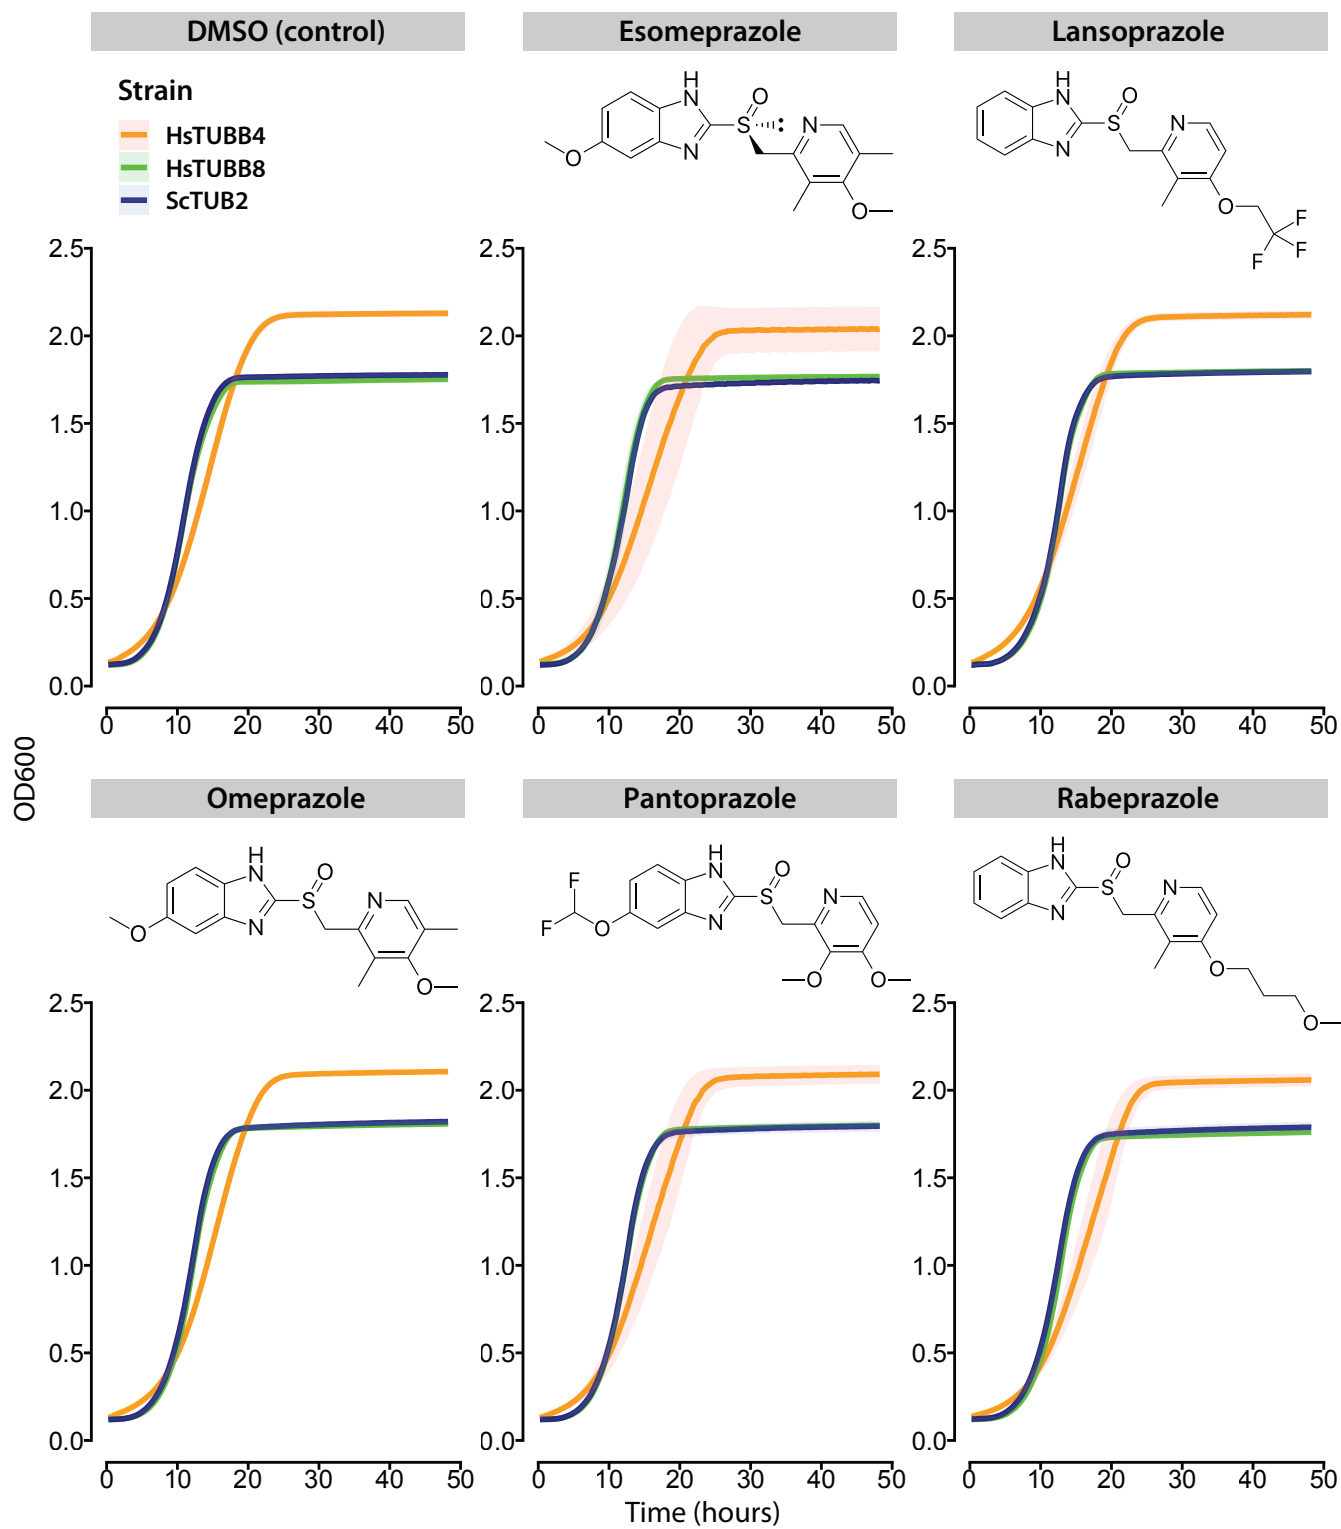**B**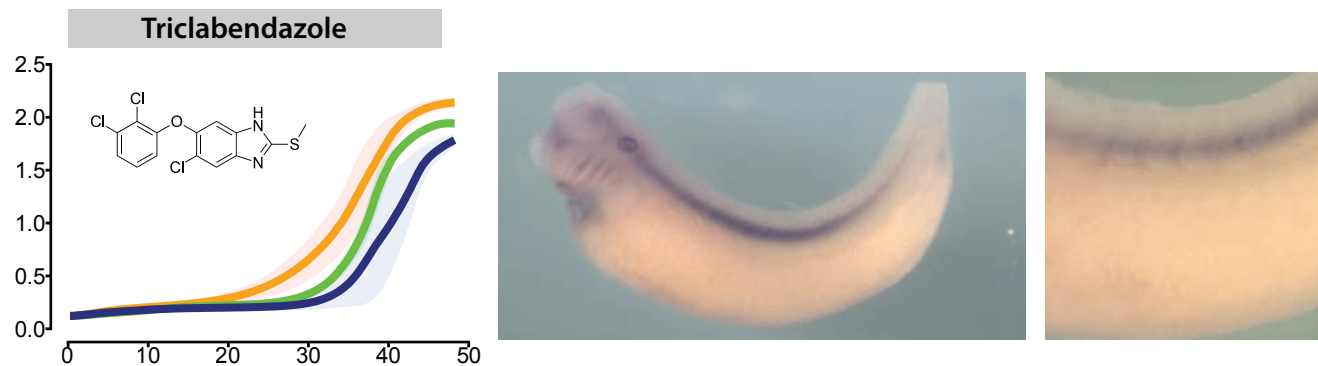**Figure S6**

Supplement: Supplementary file 4 [file 1]

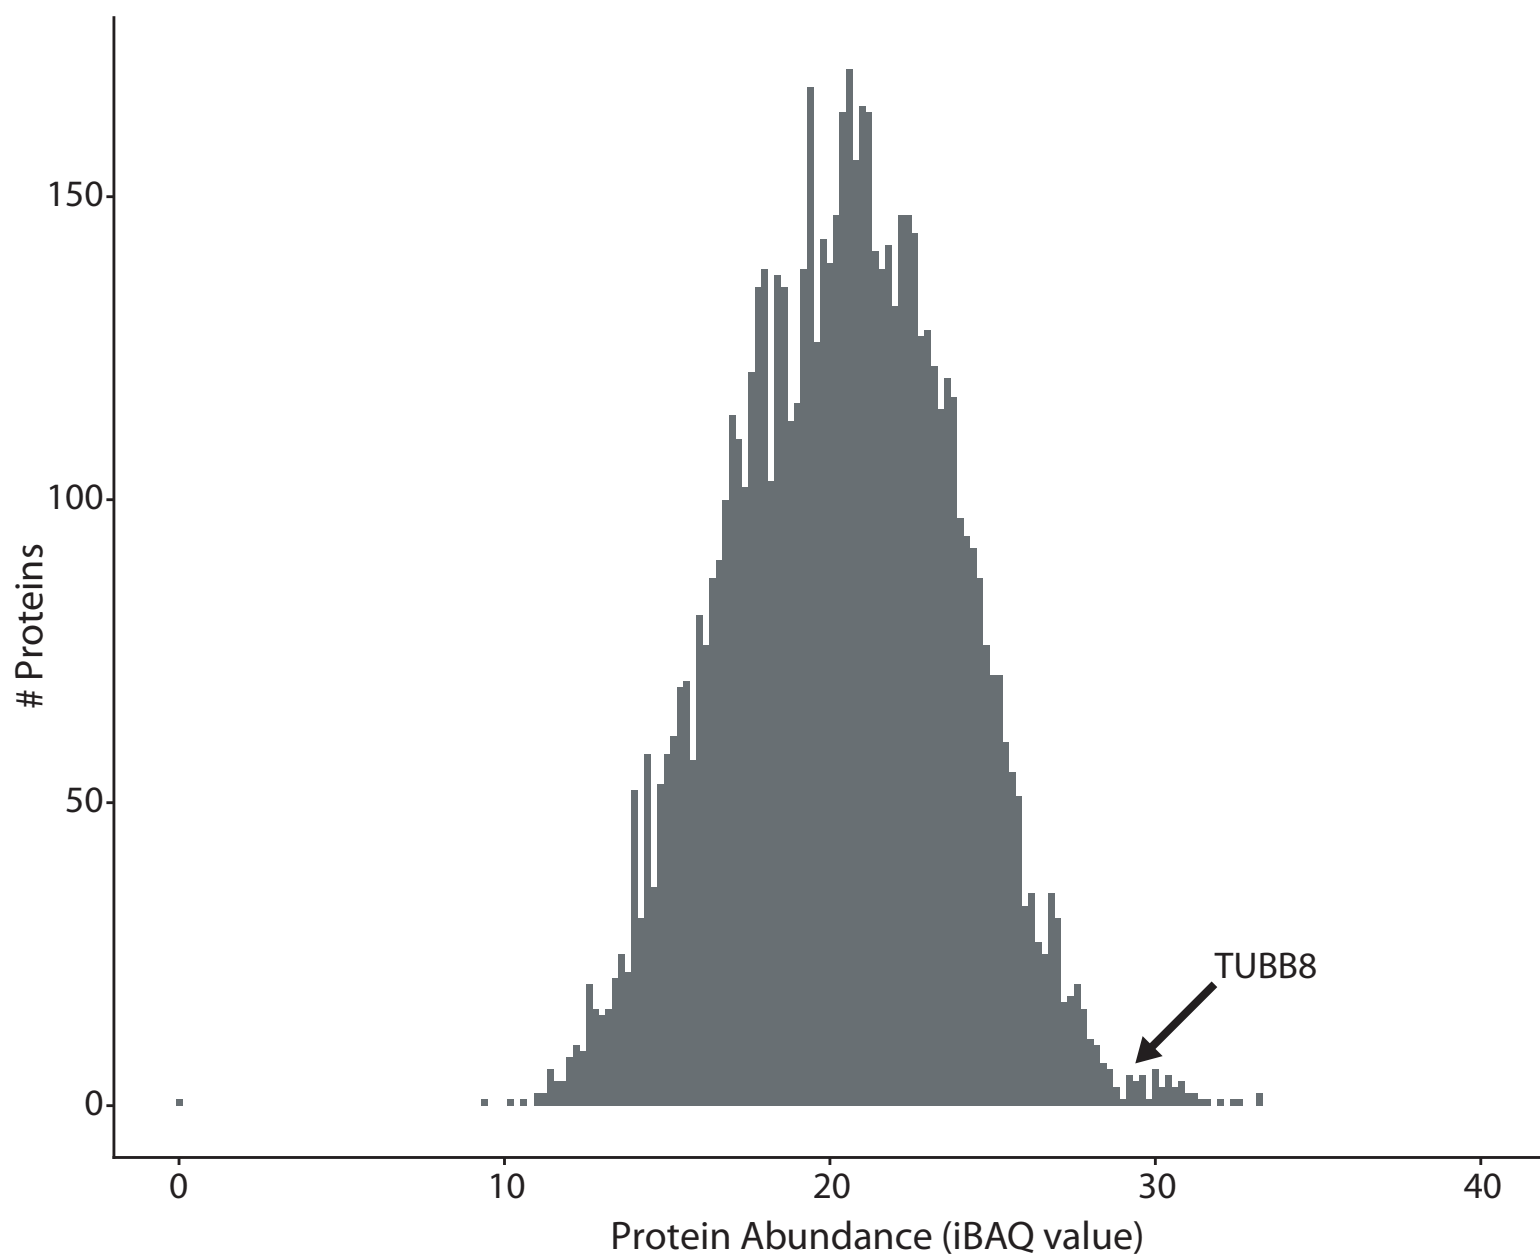

**Figure S7**

Supplement: Supplementary file 5 [file 1]

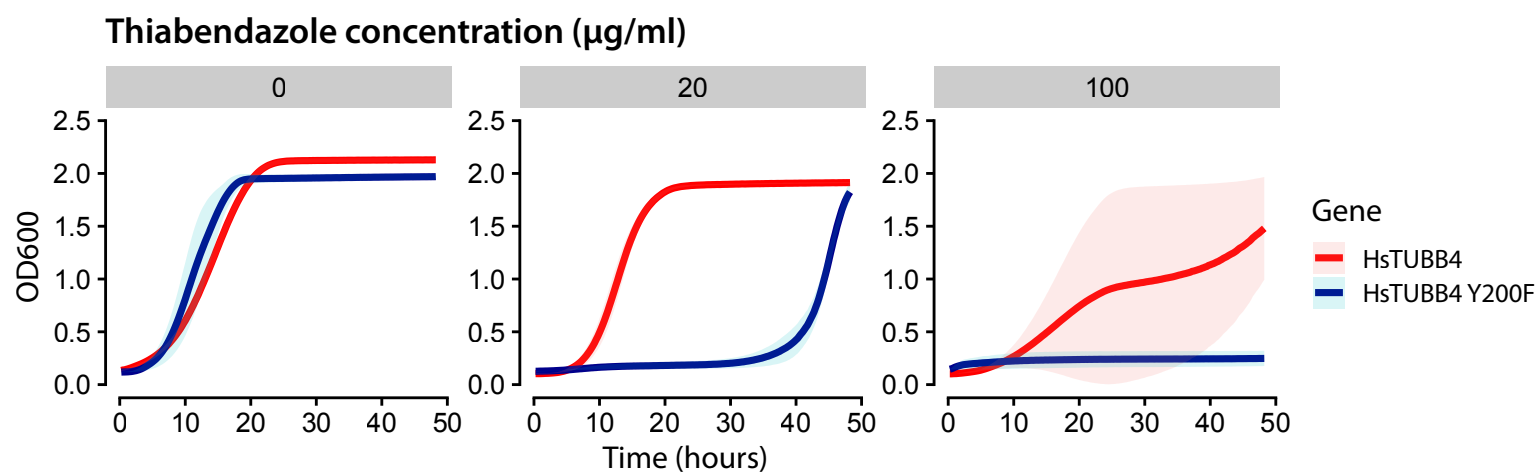

Figure S4

Supplement: Supplementary file 6 [file 1]

HsTUBB8

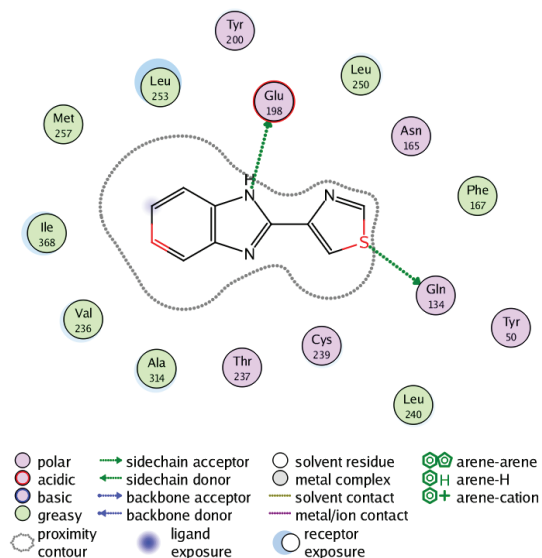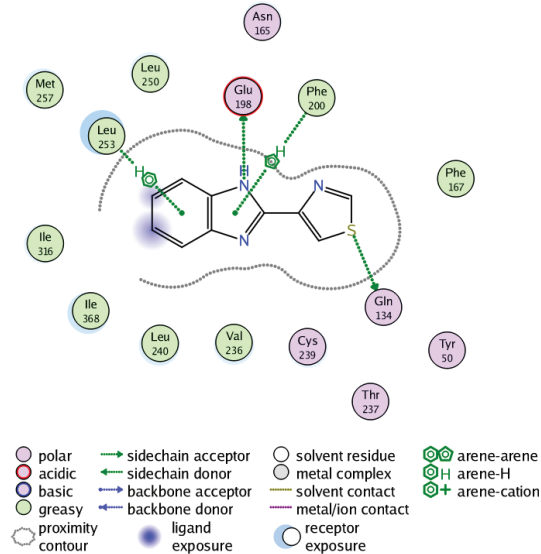

# B

**HsTUBB1**

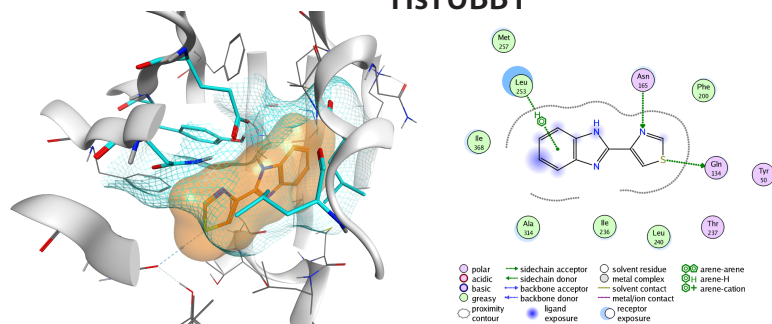

HsTUBB2A

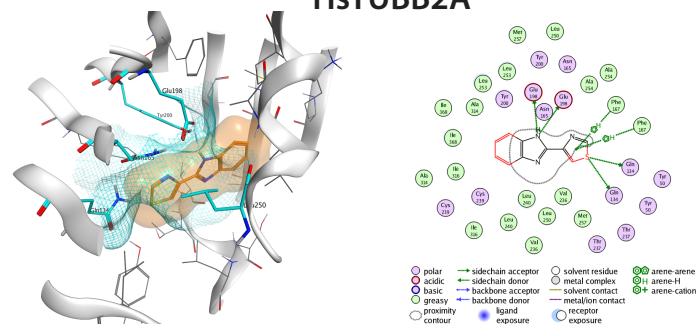

HsTUBB2C

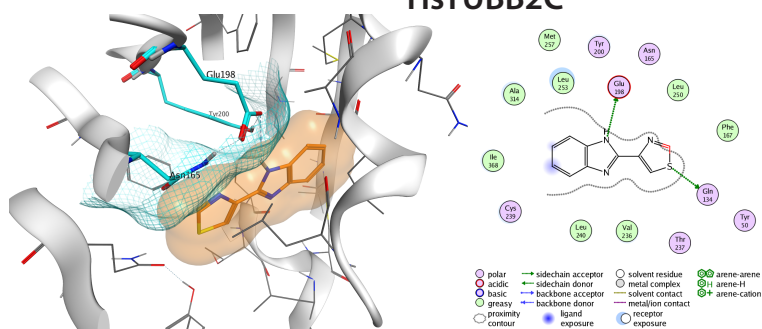

**HsTUBB3**

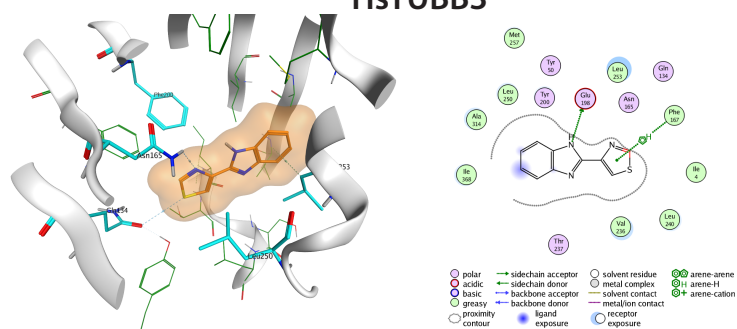

**HsTUBB5**

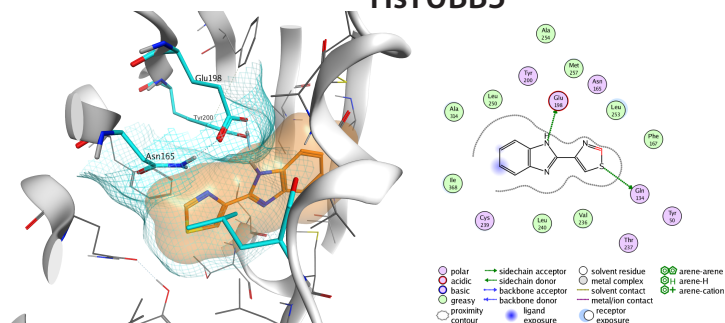

HsTUBB6

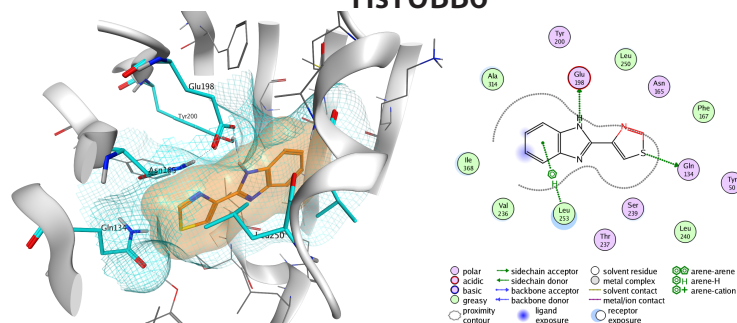

### Figure S2

Supplement: Supplementary file 7 [file 1]
